# Supplementary material for: First Demonstration of Antigen Induced Cytokine Expression by CD4-1+ Lymphocytes in a Poikilotherm: Studies in Zebrafish (Danio rerio)
Source: PubMed Central journal article supplement (PMC4470515; doi:10.1371/journal.pone.0126378), 2015-06-17
Supplement: pone.0126378.s001.pdf [file pone.0126378.s001.pdf]

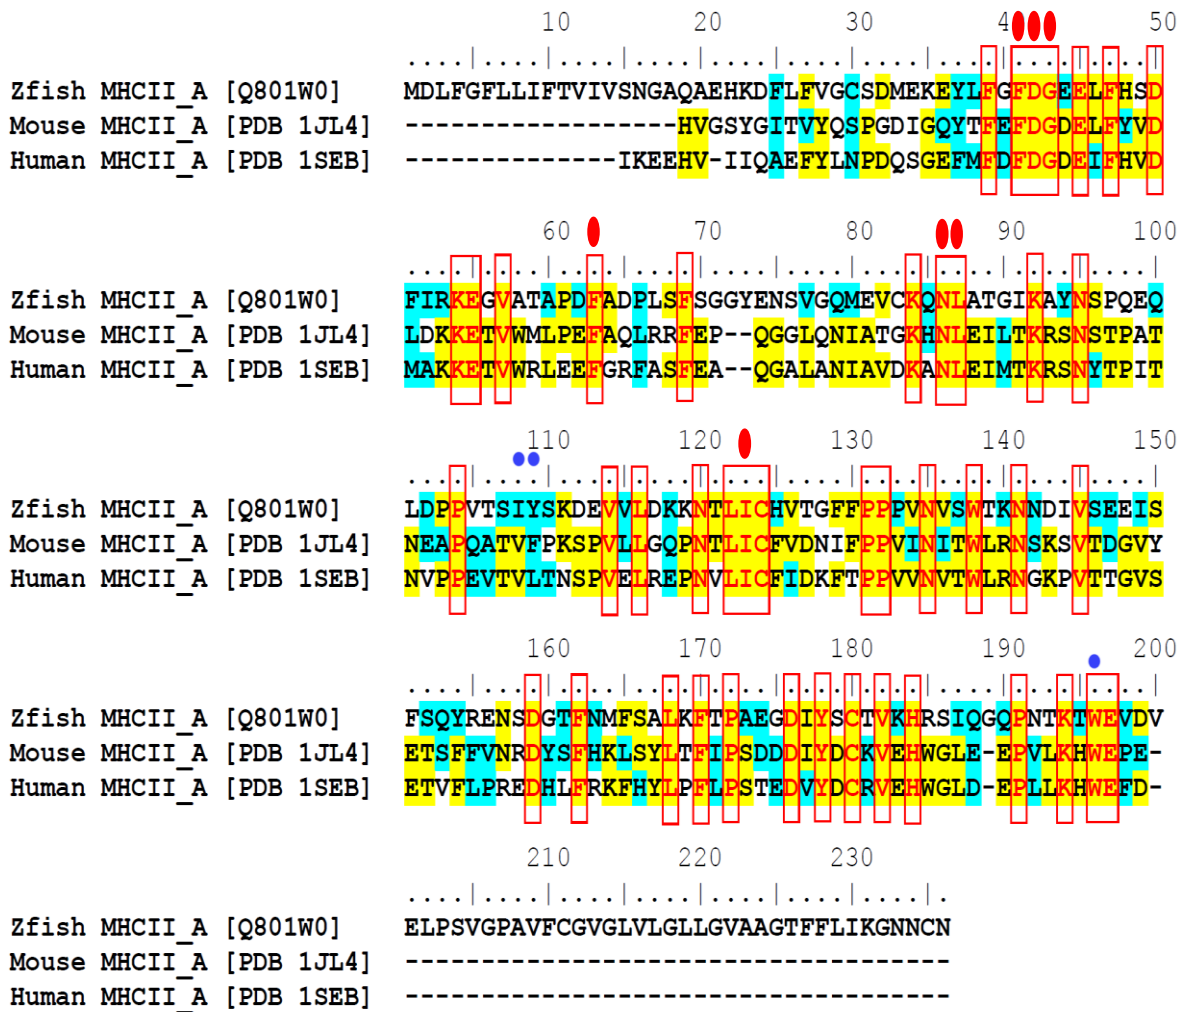

Figure S1. Sequence alignment of zebrafish, mouse and human MHC II\_A. Yellow: identical; Cyan: similar; Boxed: identical for all three; Blue dots: observed residues which make contact with the CD4 molecule in X-ray structure (PDB: 1JL4). Red ovals: conserved residues at the interface between MHCII\_A and MHCII\_B.
