# Supplementary material for: First Demonstration of Antigen Induced Cytokine Expression by CD4-1+ Lymphocytes in a Poikilotherm: Studies in Zebrafish (Danio rerio)
Source: PubMed Central journal article supplement (PMC4470515; doi:10.1371/journal.pone.0126378), 2015-06-17
Supplement: pone.0126378.s003.pdf [file pone.0126378.s003.pdf]

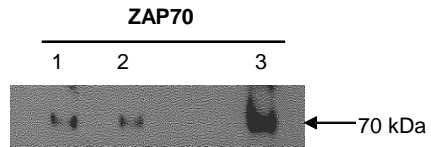

Figure S3. Validation of the ZAP70 polyclonal antibody using Western blot analysis of zebrafish leukocyte lysates. Specificity of the anti-ZAP70 antibody was confirmed by detection of a 70 kDa protein. Lanes 1, 2 and 3 represent different amounts of total protein (5ug, 10ug and 15ug), respectively.
