# Supplementary material for: First Demonstration of Antigen Induced Cytokine Expression by CD4-1+ Lymphocytes in a Poikilotherm: Studies in Zebrafish (Danio rerio)
Source: PubMed Central journal article supplement (PMC4470515; doi:10.1371/journal.pone.0126378), 2015-06-17
Supplement: pone.0126378.s007.pdf [file pone.0126378.s007.pdf]

Table S1. Primers used in cDNA synthesis and RACE PCR for zfCD4 genes.

| Primer name   | Sequence (5'-3')                        | Used for       |
|---------------|-----------------------------------------|----------------|
| Oligo-dT      | TTTTTTTTTTTTTTTTTVN                     | cDNA synthesis |
| Adapter-dT    | CTCGAGATCGATGCGGCCGCTTTTTTTTTTTTTTTTTVN | RACE PCR       |
| Adapter       | CTCGAGATCGATGCGGCCGC                    |                |
| Oligo-dG      | GGGGGGIGGGIIGGGIIG                      |                |
| CD4-2.1raceF1 | GTAGGAGCCTTTTCTGTGGTTC                  |                |
| CD4-2.1raceF2 | CAGGTACTGCAAATCCTCTTCC                  |                |
| CD4-2.1raceR1 | GCGTGTATTGTTTCCCTGACTG                  |                |
| CD4-2.1raceR2 | TGGGAATGTTTAGATGTCTCC                   |                |
| CD4-2.2raceF1 | GAAGGAGACCCAAACTGAAG                    |                |
| CD4-2.2raceF2 | CAAGTGATGAAGGCAAGTGGAC                  |                |
| CD4-2.2raceR1 | CTTCGTCTGCTGTGTTCTTCAG                  |                |
| CD4-2.2raceR2 | AAGGTGGTCTGCTTTCATTC                    |                |
| CD4-1raceF1   | GCTGACACGACTCTGAAGACAAG                 |                |
| CD4-1raceF2   | CTTGTCTTCAGAGTCGTGTCAGC                 |                |
| CD4-1raceR1   | CGCCAAATGACAAAATCAGAC                   |                |
| CD4-1raceR2   | TGTTTTCTCTGGGTAGGGTGAC                  |                |
