# Supplementary material for: First Demonstration of Antigen Induced Cytokine Expression by CD4-1+ Lymphocytes in a Poikilotherm: Studies in Zebrafish (Danio rerio)
Source: PubMed Central journal article supplement (PMC4470515; doi:10.1371/journal.pone.0126378), 2015-06-17
Supplement: pone.0126378.s008.pdf [file pone.0126378.s008.pdf]

Table S2 . Primers used in real time PCR for gene expression in zebrafish.

| Primer name                   | Sequence (5'-3')           | Used for                                 |
|-------------------------------|----------------------------|------------------------------------------|
| EF-1 $\alpha$ -F              | CTGGAGGCCAGCTCAAACAT       | Conventional PCR<br>and<br>Real Time PCR |
| EF-1 $\alpha$ -R              | ATCAAGAAGAGTAGTAGTACCG     |                                          |
| CD4-2.1-F                     | CTTCAATGTCACTCTGATAAATGTGC |                                          |
| CD4-2.1-R                     | TTACGTGCCGTGTAGATCTG       |                                          |
| CD4-2.2-F                     | TTTGGAGTTGAACTTTGGATCTGGA  |                                          |
| CD4-2.2-R                     | GATCTCAGCTTTCTCACTCTCCTC   |                                          |
| CD4-1-F                       | CTGTTTCTGTTATAGACCTTGCC    |                                          |
| CD4-1-R                       | CTGTTTCTGTTATAGACCTTGCC    |                                          |
| Tbet-F                        | TCACCAACCATACTCTC          |                                          |
| Tbet-R                        | GTATTCGGTCCCGTAAGC         |                                          |
| TcR $\alpha$ -F               | TTACTGCGAGGAGACAGGC        |                                          |
| TcR $\alpha$ -R               | TCCTCAGCCAGAAGATGCC        |                                          |
| MHC class II $\beta$ chain -F | CTGGAGTGGACACATTCTGCA      |                                          |
| MHC class II $\beta$ chain -R | CTCTTTACCATCTCTCAGCCAGG    |                                          |
| IgM-F                         | AGATCCAATACAAAGATACTATGC   |                                          |
| IgM-R                         | TGGTGAAATGGAATTGTGG        |                                          |
| CD8 $\alpha$ -F               | GGAGTACCAGGTGGGCTTTT       |                                          |
| CD8 $\alpha$ -R               | GAGGAAAAGTCCACAACCTC       |                                          |
| MCSF-R-F                      | CCAAAGCTCTCTTCTAAACTCACAC  |                                          |
| MCSF-R-R                      | GTACCTGTTCGTTATGGTTGAAAAAC |                                          |
| IFN- $\gamma$ -F              | GCATCGAAGAGCTCAAAGCTTAC    |                                          |
| IFN- $\gamma$ -R              | TCTGCTCACTTTCTCAAGATTC     |                                          |
| GATA3-F                       | GAGCTGGGACCTCATGCGCAAAC    |                                          |
| GATA3-R                       | GATGCCCTCCTTCTTCATGGTG     |                                          |
| IL-4/13A-F                    | GAAGTGTGAGCATGATTATTTT     |                                          |
| IL-4/13A-R                    | CTCGTCTTGGTGGTTGTAAG       |                                          |
| IL-4/13B-F                    | CATCCAGAGTGTGAATGGGA       |                                          |
| IL-4/13B-R                    | TTCCAGTCCCGGTATATGCT       |                                          |
| IL-17A/F1-F                   | ACCTCCGCTTTCTTATGGTGAG     |                                          |
| IL-17A/F1-R                   | ATCTTACAGAAGCCCCCTCAG      |                                          |
| IL-17A/F2-F                   | GGAAGTGGATACCGAAGTTTTC     |                                          |
| IL-17A/F2-R                   | CCTGTTTCAGCACCAGTATGTCC    |                                          |
| IL-22-F                       | CTACCTGCGATATGAAGTGC       |                                          |
| IL-22-R                       | CATTCGTGCTGTATCAGTC        |                                          |
